# Supplementary material
Source: HighWire-hosted journal article supplement (https://ijgc.bmj.com/highwire/filestream/24663/field_highwire_adjunct_files/0/ijgc-2022-003732supp001_data_supplement.pdf)
Supplement: ijgc-2022-003732supp001_data_supplement.pdf [file ijgc-2022-003732supp001_data_supplement.pdf]

**Supplementary table 1. Specific material needed for carrying out the procedure**

| No. | Items                               |
|-----|-------------------------------------|
| 1   | Ultrasound knife; LigaSure; Bipolar |

**Supplementary table 2. A summary of tips for carrying out the procedure**

| No. | Tips                                                                                                                                                                                                                                                                                                                                                                                                                                                                                                                                                                                    |
|-----|-----------------------------------------------------------------------------------------------------------------------------------------------------------------------------------------------------------------------------------------------------------------------------------------------------------------------------------------------------------------------------------------------------------------------------------------------------------------------------------------------------------------------------------------------------------------------------------------|
| 1   | To expose the key anatomic landmarks surrounding the enlarged lymph nodes, including external iliac vessels, internal iliac vessels, ureter, and obturator nerve to avoid <b>accidental</b> injuries                                                                                                                                                                                                                                                                                                                                                                                    |
| 2   | <b>To excise the lymph nodes in a logic way:</b><br><b>Step 1:</b> opening of the retroperitoneum and development of the pelvic spaces.<br><b>Step 2:</b> dissection and medicalization of the ureter.<br><b>Step 3:</b> lysis of the adhesions between the enlarged lymph nodes and the internal iliac artery.<br><b>Step 4:</b> identification the obturator nerve and the internal iliac vein.<br><b>Step 5:</b> lysis of the adhesions between the enlarged lymph nodes and the external iliac vein.<br><b>Step 6:</b> mobilization of the cranial end of the enlarged lymph nodes. |
